# Supplementary material
Source: publisher figshare collection journal article supplement (https://gsajournals.figshare.com/ndownloader/files/12264308)
Supplement: Supplementary file 1 [file 12264308]

## Sheet: Sheet1
List of clusters with the illustrative spatial representation of high (red) and low (white) expression, binary designation and main gametogenic processes
Hermaphrodite clusters
#	Diagram	Binary designation	Sections with higher levels	Sections with lower levels	Gametogenic processes
1		1000000000	1	2-10	Proliferation/mitosis
2		1100000000	1-2	3-10	Proliferation/mitosis and leptotene zygotene
3		1111110000	1-6	7-10	Proliferation/mitosis and leptotene - diplotene
4		0001110000	4-6	1-3, 7-10	Pachytene - diplotene
5		0011111111	3-10	1-2	Prophase I
6		0000011100	6-8	1-5, 9-10	Diplotene – early diakinesis
7		0000001111	7-10	1-6	Late diplotene - diakinesis
#	Diagram	Binary designation	Sections with higher levels	Sections with lower levels	Gametogenic processes
1		1111000000	1-4	5-10	Proliferation/mitosis and leptotene zygotene
2		0000111100	5-8	1-4, 9-10	Late prophase I and divisions
3		0000000010	9	1-8, 10	Early spermiogenesis
4		0000000001	10	1-9	Early spermiogenesis / Sperm
